# Supplementary material for: MTFR2 Promotes the Proliferation, Migration, and Invasion of Oral Squamous Carcinoma by Switching OXPHOS to Glycolysis
Source: PubMed Central journal article supplement (PMC7267185; doi:10.3389/fonc.2020.00858), 2020-05-27
Supplement: Table_1.pdf [file Table_1.pdf]

| Characteristics | Patients<br>(n=36) |
|-----------------|--------------------|
| Age (Years)     |                    |
| > 60            | 16                 |
| ≤60             | 20                 |
| Gender          |                    |
| Male            | 21                 |
| Female          | 15                 |
| Stage           |                    |
| I+II            | 12                 |
| III+IV          | 24                 |
| Lymph node      |                    |
| Negative        | 25                 |
| Positive        | 11                 |
